# Supplementary material for: A Drosophila Model for EGFR-Ras and PI3K-Dependent Human Glioma
Source: PubMed Central journal article supplement (PMC2636203; doi:10.1371/journal.pgen.1000374), 2009-02-13
Supplement: pgen.1000374.s013.pdf [file pgen.1000374.s013.pdf]

**Table S1: Overexpression of EGFR-Ras and PI3K-Akt pathways in *Drosophila* glia**

| Gene (UAS construct)                                                                                                                                                                                                                                                                                                                                                                                                       | <i>repo-Gal4</i> glial overexpression phenotypes                                                                                                                                                              |
|----------------------------------------------------------------------------------------------------------------------------------------------------------------------------------------------------------------------------------------------------------------------------------------------------------------------------------------------------------------------------------------------------------------------------|---------------------------------------------------------------------------------------------------------------------------------------------------------------------------------------------------------------|
| <i>dEGFR</i> <sup>λ</sup><br><i>dEGFR</i> <sup>E<sub>1p</sub></sup><br><i>dEGFR</i> <sup>wild-type</sup><br><i>dRas85D</i> <sup>V12</sup><br><i>dRaf</i> <sup>g<sup>of</sup></sup>                                                                                                                                                                                                                                         | glial hyperplasia, CNS morphogenesis defects, lethal                                                                                                                                                          |
| <i>dp110</i> <sup>CAAX</sup><br><i>dp110</i> <sup>wild-type</sup><br><i>dPTEN</i> <sup>dsRNA</sup><br><i>dAkt</i>                                                                                                                                                                                                                                                                                                          | normal glial cell numbers-slight glial hyperplasia, viable                                                                                                                                                    |
| <i>dEGFR</i> <sup>λ</sup> ; <i>dp110</i> <sup>CAAX</sup><br><i>dEGFR</i> <sup>λ</sup> ; <i>dAkt</i><br><i>dRas85D</i> <sup>V12</sup> ; <i>dp110</i> <sup>CAAX</sup><br><i>dRas85D</i> <sup>V12</sup> ; <i>dPTEN</i> <sup>dsRNA</sup><br><i>dRas85D</i> <sup>V12</sup> ; <i>dPTEN</i> <sup>+/-</sup><br><i>dRas85D</i> <sup>V12</sup> ; <i>dAkt</i><br><i>dRaf</i> <sup>g<sup>of</sup></sup> ; <i>dp110</i> <sup>CAAX</sup> | glial neoplasia, neuronal loss, behavior defects, CNS morphogenesis defects including enlarged brain lobes and elongated ventral nerve cord, early lethality or prolonged larval phase before pupal lethality |
| <i>dEGFR</i> <sup>λ</sup> ; <i>dp110</i> <sup>CAAX</sup> ; <i>dRas85D</i> <sup>N17</sup>                                                                                                                                                                                                                                                                                                                                   | Suppression of neoplasia and other phenotypes, sometimes viable                                                                                                                                               |
| <i>dEGFR</i> <sup>λ</sup> ; <i>dp110</i> <sup>CAAX</sup> ; <i>dPTEN</i> <sup>wild-type</sup>                                                                                                                                                                                                                                                                                                                               | Suppression of neoplasia and other phenotypes, lethal                                                                                                                                                         |

3<sup>rd</sup> instar larval brains for each genotype were scored for glial cell numbers, morphology, and position, when possible. 1<sup>st</sup> and 2<sup>nd</sup> instar brains were scored for genotypes that showed earlier lethality, including *dEGFR*<sup>E<sub>1p</sub></sup> and *dRas85D*<sup>V12</sup>; *dAkt*.
