# Supplementary material for: A Drosophila Model for EGFR-Ras and PI3K-Dependent Human Glioma
Source: PLOS journal article supplement (doi:10.1371/journal.pgen.1000374), 2009-02-13
Supplement: S14 (10.1371/journal.pgen.1000374.s014) [file journal.pgen.1000374.s014]

**Table S2: Co-activation of EGFR and PI3K does not elicit neoplasia in all neural cell types**

| Neural cell type                              | Gal4 lines tested with <i>dEGFR<sup>Δ</sup></i> ; <i>dp110<sup>CAAX</sup></i>                                     |
|-----------------------------------------------|-------------------------------------------------------------------------------------------------------------------|
| neuronal precursors, neurons                  | <i>elav-Gal4<sup>b</sup></i> , <i>scratch-Gal4<sup>a</sup></i> , <i>OK107-Gal4</i> , <i>Appl-Gal4<sup>a</sup></i> |
| neuroblasts, neural precursors                | <i>worniu-Gal4<sup>a</sup></i> , <i>1407-Gal4<sup>a, b</sup></i>                                                  |
| mixed lineage neurons, neuroblasts, some glia | <i>pros-Gal4<sup>a, b</sup></i>                                                                                   |
| differentiated glia                           | <i>Eaat-Gal4<sup>a</sup></i> , <i>Nrv2-Gal4<sup>a, c</sup></i> , <i>Mz97-Gal4<sup>a, b</sup></i>                  |
| embryonic glia                                | <i>gcm-Gal4</i> (transient in glia)                                                                               |

For all *Gal4-UAS-dEGFR<sup>Δ</sup> UAS-dp110<sup>CAAX</sup>* combinations listed, 3<sup>rd</sup> instar larval brains were examined for expression of Repo protein (to count glial cell numbers) and Elav protein (to count neuronal cell numbers). Control crosses of each *Gal4* to *UAS-CD8GFP* were also performed to verify expression patterns.

<sup>a</sup> *UAS-dEGFR<sup>Δ</sup>*; *UAS-dp110<sup>CAAX</sup>* combined with *UAS-Gal4* amplification

<sup>b</sup> lethality in larval or early pupal stages both with and without *UAS-Gal4* amplification

<sup>c</sup> lethality only with *UAS-Gal4* amplification
